# Supplementary material
Source: Springer Nature journal article supplement (https://www.springermedizin.de/resource/supplementary/12874_2013_955_MOESM9_ESM.pdf/9433212)

EWMA  $\lambda = 0.16$ , putative 1SD mean increase in GARCH residuals

Raw mortality

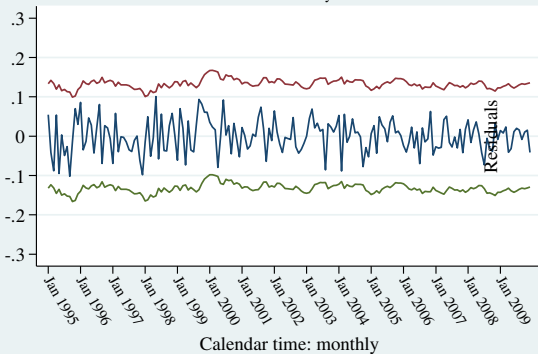

EWMA  $\lambda = 0.42$ , putative 2SD mean increase in GARCH residuals

Raw mortality

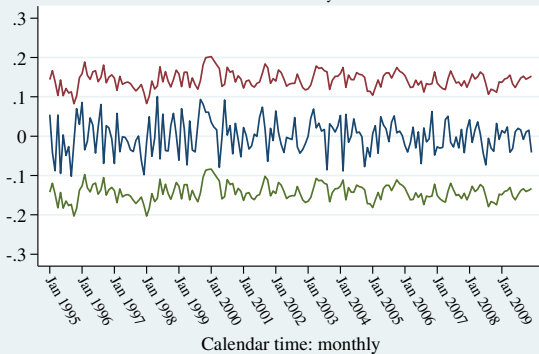

EWMA  $\lambda = 0.71$ , putative 3SD mean increase in GARCH residuals

Raw mortality

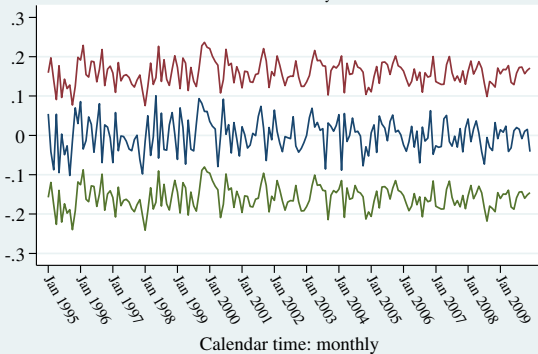

Supplement: MOESM9 [file 9433212]
